# Supplementary material
Source: PubMed Central journal article supplement (PMC11105523)
Supplement: 18_2019_3078_MOESM1_ESM.pdf [file 18_2019_3078_MOESM1_ESM.pdf]

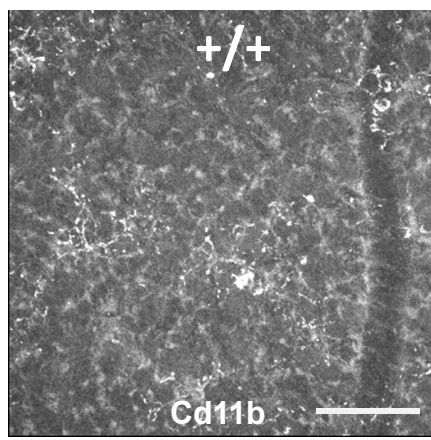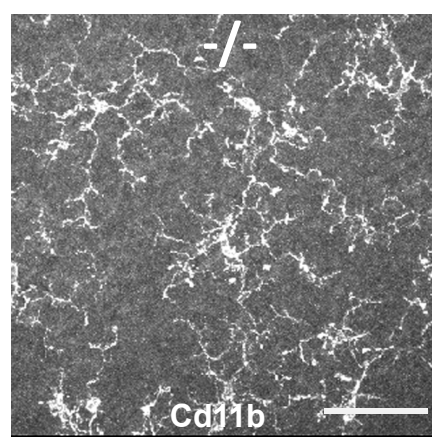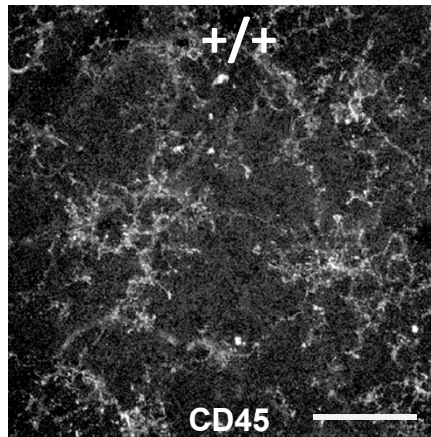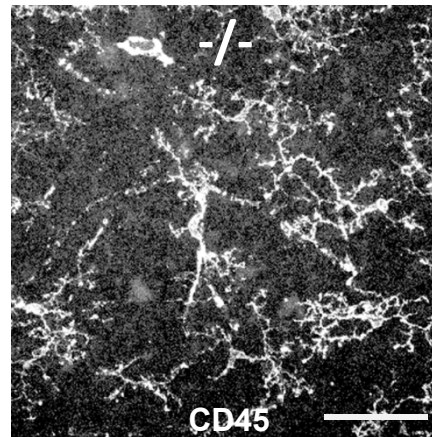

**Supplemental Figure 1. Activation of ramified CD11b<sup>+</sup> and CD45<sup>+</sup>-microglia in the retinal ganglion cell layer caused by loss of *Ranbp2* in retinal ganglion neurons (RGNs).** Confocal images of retinal flat mounts (ganglion neurons facing up) of +/+ and -/- mice immunostained for CD11b (A) and Cd45 (B) at d10 showing the activation of ramified microglia in -/- compared to +/+ mice. In comparison to +/+, -/- mice show stronger immunolabeled CD11b<sup>+</sup> and CD45<sup>+</sup>-microglia. Image panels of Fig 6 underwent identical post-acquisition gamma-intensity corrections for the sole purpose of showing that weakly immunostained microglia of +/+ mice have also ramified morphology. Scale bars=50μm; d10, day 10 post-tamoxifen administration; -/-, *SLICK-H::Ranbp2<sup>flox/flox</sup>*; +/+, *SLICK-H::Ranbp2<sup>+/+</sup>*.
